# Supplementary material
Source: PubMed Central journal article supplement (PMC6143012)
Supplement: jamaoncol-4-1199-s002.pdf [file jamaoncol-4-1199-s002.pdf]

## Supplementary Online Content

Joensuu H, Fraser J, Wildiers H, et al. Effect of adjuvant trastuzumab for a duration of 9 weeks vs 1 year with concomitant chemotherapy for early human epidermal growth factor receptor 2–positive breast cancer: the SOLD randomized clinical trial. *JAMA Oncol*. Published online May 31, 2018. doi:10.1001/jamaoncol.2018.1380

**eFigure 1.** Cardiac Disease-Free Survival

**eFigure 2.** Kaplan-Meier Estimates of Disease-Free Survival Stratified by the Scheduled Docetaxel Dose

**eFigure 3.** Mean Cardiac Ejection Fractions Stratified by the Treatment Group

**eTable 1.** Most Frequent Adverse Events in the Safety Population During Docetaxel Plus Trastuzumab Administration (Cycles 1 to 3)

**eTable 2.** Most Frequent Adverse Events in the Safety Population During Fluorouracil, Epirubicin, and Cyclophosphamide (FEC) Administration (Cycles 4 to 6)

This supplementary material has been provided by the authors to give readers additional information about their work.

**eFigure 1. Cardiac Disease-Free Survival**

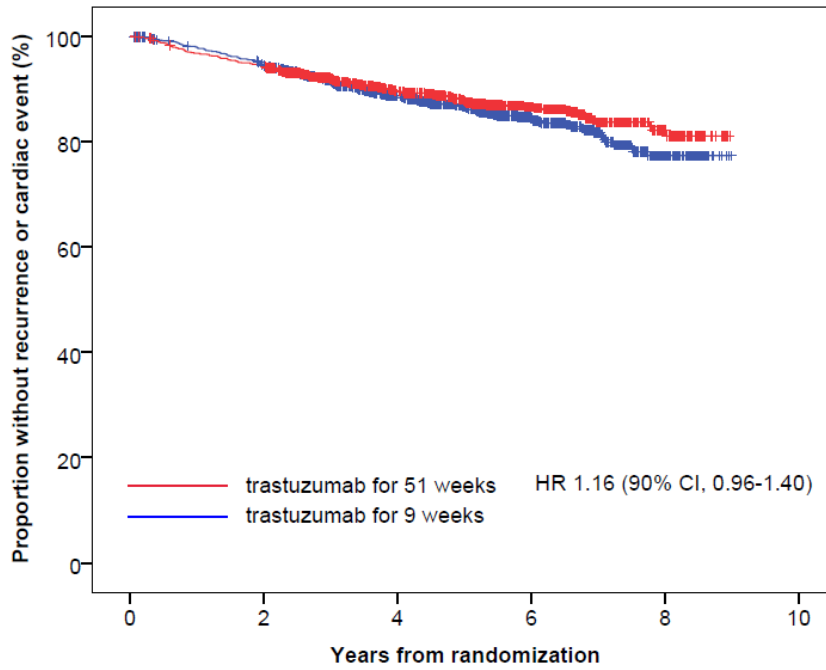

| Number at risk | 0    | 2    | 4   | 6   | 8  | 10 |
|----------------|------|------|-----|-----|----|----|
| 9 weeks        | 1085 | 1003 | 699 | 362 | 71 | 0  |
| 51 weeks       | 1089 | 1021 | 722 | 380 | 78 | 0  |

**eFigure 2. Kaplan-Meier Estimates of Disease-Free Survival Stratified by the Scheduled Docetaxel Dose**

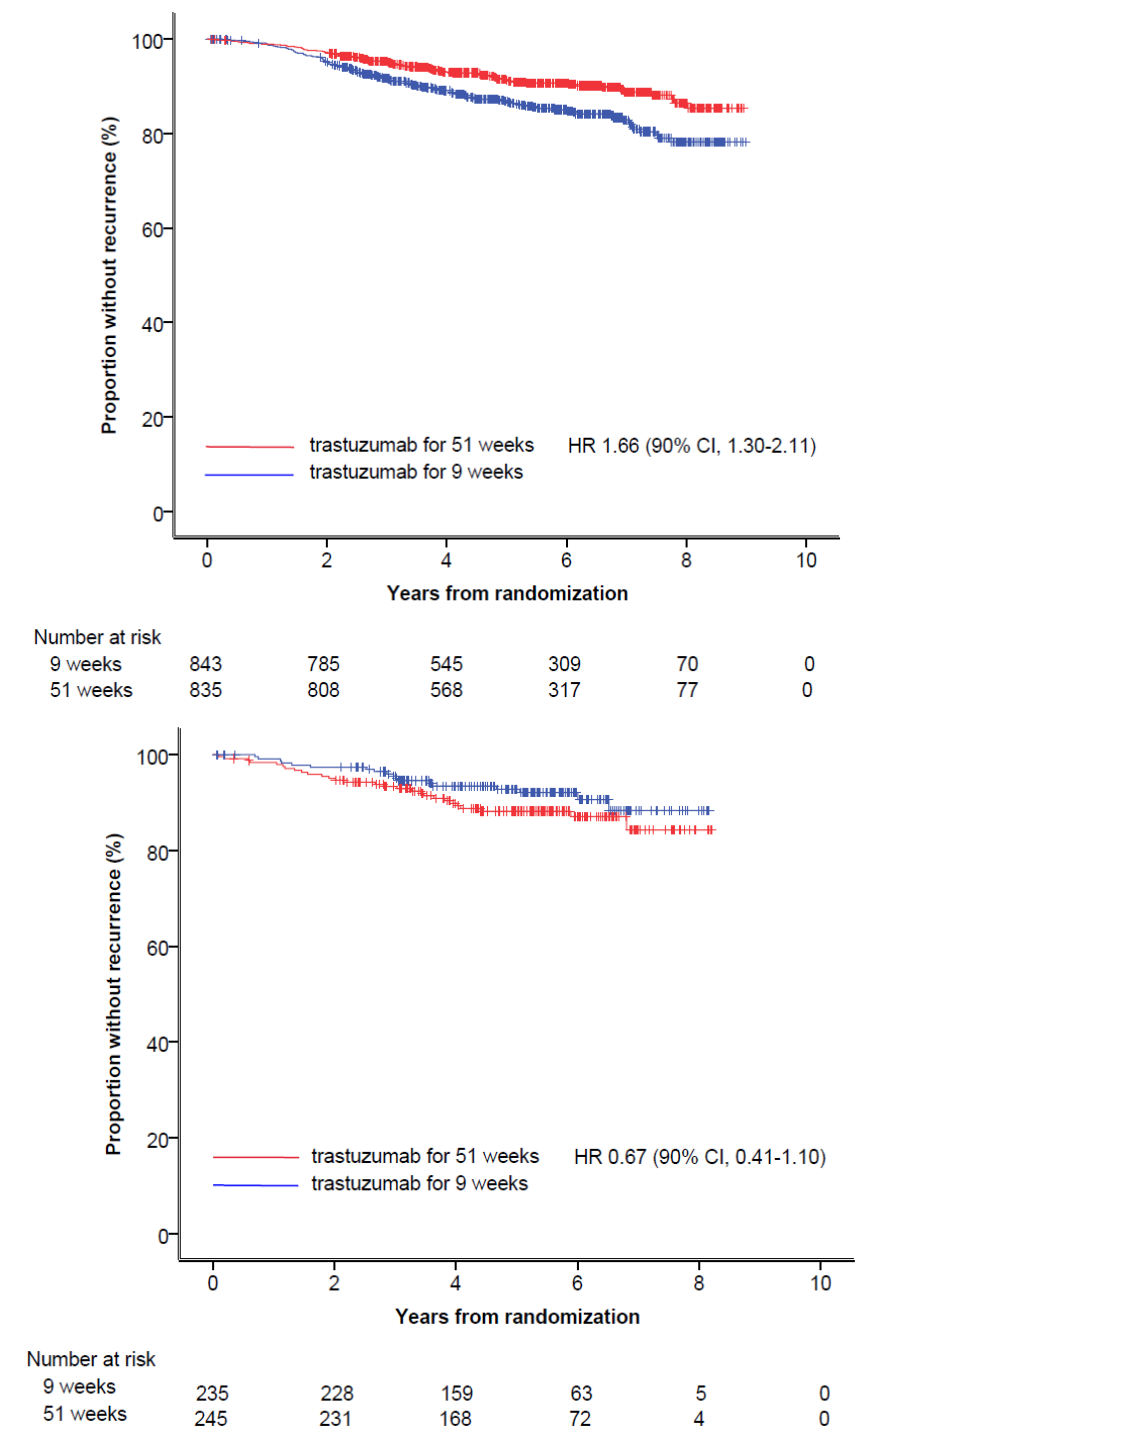

Upper panel, docetaxel dose 80 mg/m<sup>2</sup>; lower panel, docetaxel dose 100 mg/m<sup>2</sup>. Sixteen patients who did not complete the first docetaxel infusion (9-week group, 7; 51-week group, 9) are excluded from the analysis.

**eFigure 3. Mean Cardiac Ejection Fractions Stratified by the Treatment Group**

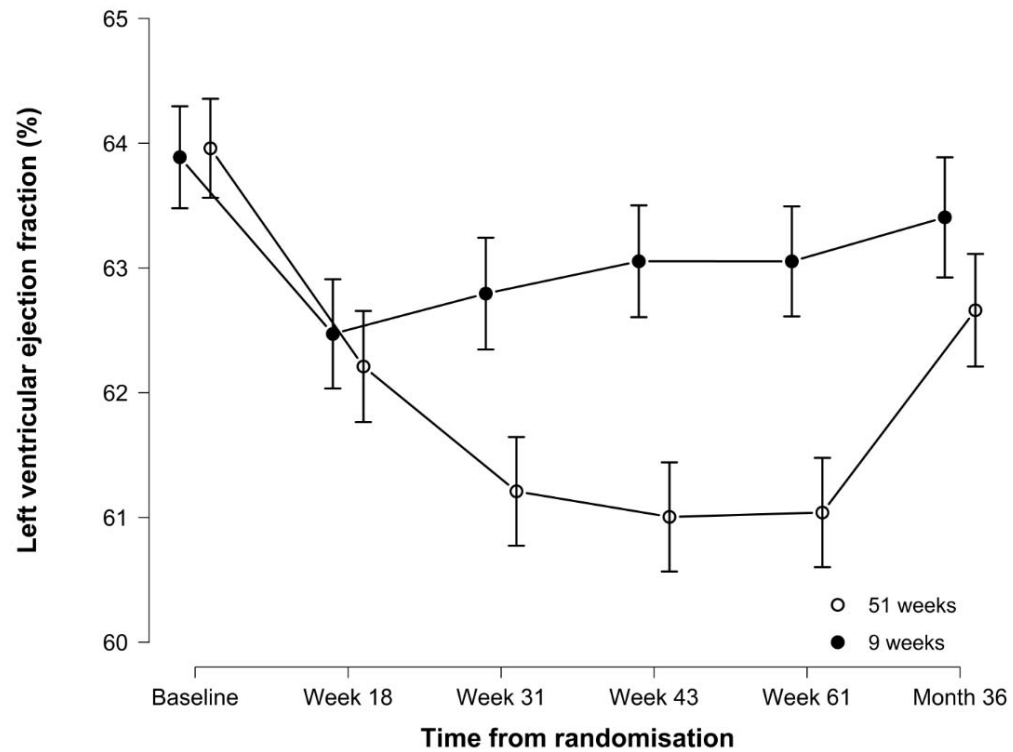

The bars denote the 95% confidence intervals.  $P < .001$  between the groups.

**eTable 1. Most Frequent Adverse Events in the Safety Population During Docetaxel Plus Trastuzumab Administration (Cycles 1 to 3)**

| Event <sup>a</sup>            | 9-week Group         |                                      | 1-Year Group         |                                      |
|-------------------------------|----------------------|--------------------------------------|----------------------|--------------------------------------|
|                               | Any Grade<br>No. (%) | Grade 3 or 4 <sup>b</sup><br>No. (%) | Any Grade<br>No. (%) | Grade 3 or 4 <sup>b</sup><br>No. (%) |
| Any event <sup>c</sup>        | 1078 (100)           | 610 (56)                             | 1081 (100)           | 625 (58)                             |
| Alopecia                      | 994 (93)             | -                                    | 984 (92)             | -                                    |
| Neutropenia <sup>c</sup>      | 555 (51)             | 482 (45)                             | 569 (53)             | 495 (46)                             |
| Fatigue                       | 903 (84)             | 42 (4)                               | 913 (85)             | 40 (4)                               |
| Infection with neutropenia    | 196 (18)             | 161 (15)                             | 209 (19)             | 161 (15)                             |
| Febrile neutropenia           | 144 (13)             | 144 (13)                             | 129 (12)             | 128 (12)                             |
| Myalgia                       | 40 (4)               | 2 (0)                                | 44 (4)               | 2 (0)                                |
| Pain                          | 690 (64)             | 37 (4)                               | 717 (67)             | 38 (4)                               |
| Diarrhea                      | 512 (48)             | 33 (3)                               | 507 (47)             | 31 (3)                               |
| Nail changes                  | 282 (26)             | 0 (0)                                | 236 (22)             | 1 (0)                                |
| Infection, no neutropenia     | 213 (20)             | 52 (5)                               | 244 (23)             | 61 (6)                               |
| Stomatitis                    | 597 (55)             | 7 (1)                                | 588 (55)             | 8 (1)                                |
| Dyspnoea                      | 38 (4)               | 3 (0)                                | 35 (3)               | 1 (0)                                |
| Vomiting                      | 100 (9)              | 5 (1)                                | 103 (10)             | 6 (1)                                |
| Nausea                        | 436 (40)             | 10 (1)                               | 410 (38)             | 6 (1)                                |
| Thrombocytopenia <sup>c</sup> | 89 (8)               | 5 (1)                                | 91 (8)               | 2 (0)                                |
| Elevation of serum ALT        | 295 (27)             | 3 (0)                                | 294 (27)             | 8 (1)                                |

Abbreviation: ALT, alanine aminotransferase.

<sup>a</sup>Adverse events were graded with Common Terminology Criteria for Adverse Events (CTCAE) version 3.0.

<sup>b</sup>None of the patients died during docetaxel chemotherapy in the 9-week group, and 2 died in the 1-year group (1 from septic shock, 1 from acute respiratory distress syndrome).

<sup>c</sup>Based on the nadir counts. The nadir counts were not required to be measured in all study centers.

**eTable 2. Most Frequent Adverse Events in the Safety Population During Fluorouracil, Epirubicin, and Cyclophosphamide (FEC) Administration (Cycles 4 to 6)**

| Event <sup>a</sup>            | 9-week Group         |                                      | 1-Year Group         |                                      |
|-------------------------------|----------------------|--------------------------------------|----------------------|--------------------------------------|
|                               | Any Grade<br>No. (%) | Grade 3 or 4 <sup>b</sup><br>No. (%) | Any Grade<br>No. (%) | Grade 3 or 4 <sup>b</sup><br>No. (%) |
| Any event <sup>c</sup>        | 1048 (100)           | 535 (51)                             | 1051 (100)           | 593 (56)                             |
| Alopecia                      | 966 (92)             | -                                    | 966 (92)             | -                                    |
| Neutropenia <sup>c</sup>      | 647 (62)             | 463 (44)                             | 656 (62)             | 508 (48)                             |
| Fatigue                       | 917 (88)             | 35 (3)                               | 913 (87)             | 54 (5)                               |
| Infection with neutropenia    | 76 (7)               | 48 (5)                               | 81 (8)               | 50 (5)                               |
| Febrile neutropenia           | 40 (4)               | 40 (4)                               | 38 (4)               | 38 (4)                               |
| Myalgia                       | 12 (1)               | 0 (0)                                | 9 (1)                | 0 (0)                                |
| Pain                          | 435 (42)             | 7 (1)                                | 431 (41)             | 8 (1)                                |
| Diarrhea                      | 265 (25)             | 7 (1)                                | 255 (24)             | 6 (1)                                |
| Nail changes                  | 540 (52)             | 4 (0)                                | 511 (49)             | 5 (1)                                |
| Infection, no neutropenia     | 147 (14)             | 24 (2)                               | 166 (16)             | 29 (3)                               |
| Stomatitis                    | 338 (32)             | 3 (0)                                | 357 (34)             | 1 (0)                                |
| Dyspnoea                      | 32 (3)               | 3 (0)                                | 44 (4)               | 0 (0)                                |
| Vomiting                      | 226 (22)             | 11 (1)                               | 208 (20)             | 11 (1)                               |
| Nausea                        | 737 (70)             | 15 (1)                               | 746 (71)             | 13 (1)                               |
| Thrombocytopenia <sup>c</sup> | 142 (14)             | 3 (0)                                | 156 (15)             | 6 (1)                                |
| Elevation of serum ALT        | 209 (20)             | 4 (0)                                | 233 (22)             | 1 (0)                                |

Abbreviation: ALT, alanine aminotransferase.

<sup>a</sup>Adverse events were graded with Common Terminology Criteria for Adverse Events (CTCAE) version 3.0.

<sup>b</sup>Two patients died during FEC chemotherapy in 9-week group (1 from pneumonitis, 1 from multiorgan failure), and none in the 1-year group.

<sup>c</sup>Based on the nadir counts. The nadir counts were not required to be measured in all study centers.
